# Supplementary material
Source: publisher figshare collection journal article supplement (https://gsajournals.figshare.com/ndownloader/files/16189658)
Supplement: Supplementary file 1 [file 16189658]

## Sheet: Sheet1
Data type	Experimental species	Symbol/name used in publication	Source – public	Source – published	Source – unpublished	Identifiers	New reagent	Comments
Data type (mandatory) Duplicate rows as needed. Order is flexible, but row titles must be preserved.	Experimental species (mandatory, "NA" okay)	Symbol/name used in publication (mandatory)	Source – public [stock center; company, data repository] (one of D,E,F mandatory)	Source -- published [PMID or 'this paper'] (one of D,E,F mandatory)	Source – unpublished [description, incl. lab of origin] (one of D,E,F mandatory)	Identifiers [format as ID_source:identifier] Separate multiple entries with semi-colon, space	New reagent (mandatory for new entities) Description, progenitor(s)	Comments (optional) Genotypes, purpose of reagent, additional information
gene (source not applicable)			NA	NA	NA
strain, strain_background
genetic reagent (in whole organism)	Saccharomyces cerevisiae	BY4741	ATCC
cell line	NA
transfected construct (in cell line)	NA
antibody	NA
recombinant DNA reagent	NA
sequence-based reagent	NA
peptide, recombinant protein	NA
large-scale dataset	NA	Saccharomyces cerevisiae S288C	NCBI BioProject: PRJNA43747					Reference genome for assembly workflow
commercial assay	NA
chemical compound, drug	NA
software, algorithm	NA	Lasergene SeqMan Ngen version # 14.1.0(115)	DNASTAR, Inc.
other	NA	Trypan Blue	ThermoFisher Scientific					Vital stain according to product instructions.
